# Supplementary material for: Dip-Coating Self-Assembly Fabrication and Polarization Sensitive Photoresponse of Aligned Single-Walled Carbon Nanotube Film
Source: MDPI journal article supplement (doi:10.3390/s22020490), 2022-01-10
Supplement: s1 [file s1]

## Supporting Information

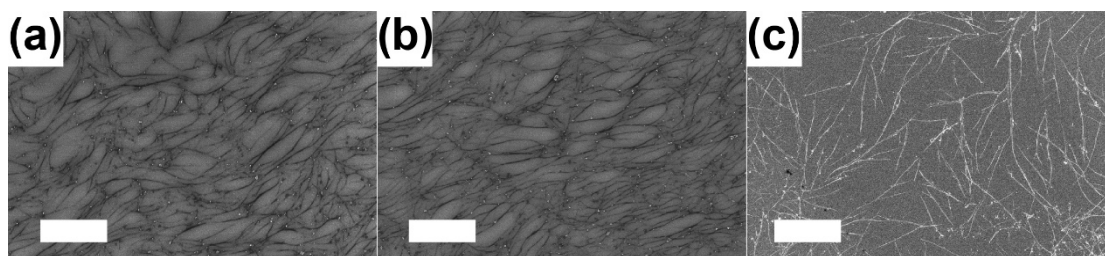

**Figure S1.** SEM images (scale bar, 2 μm) for P1-, P2-, and P3-SWCNTs.

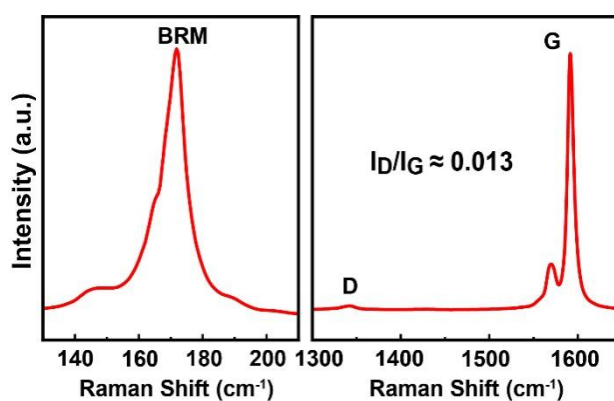

**Figure S2.** Raman spectrum for as-prepared P3-SWCNT film added with SDS.

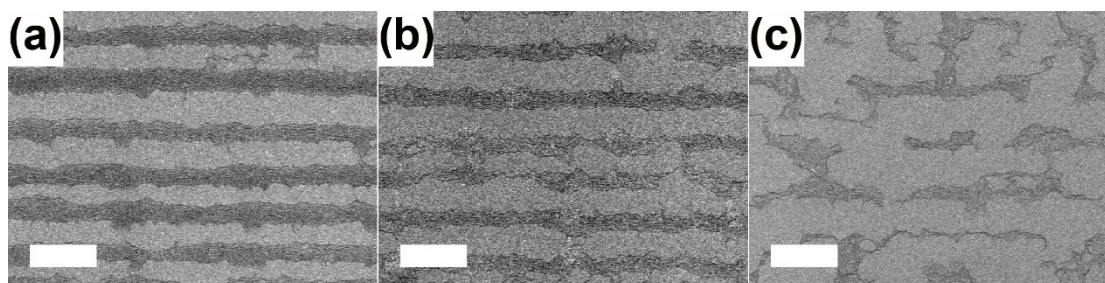

**Figure S3.** SEM images (scale bar, 10 μm) to illustrate the withdrawal speed effect for P3-SWCNT films at different withdrawal speeds (0.10, 0.15 and 0.20 μm/s), and with a fixed SWCNT concentration (~14 μg/ml) and under ambient conditions (~17 °C, RH=~50-70%).
